# Supplementary material
Source: publisher figshare collection journal article supplement (https://frontiersin.figshare.com/ndownloader/files/30414357)
Supplement: Supplementary file [file 30414357]

### *Supplementary Material 3*

Table S1.- Results from univariate ANOVAs testing differences between leaf functional traits and formations. For each analysis, *F*-value is shown. n.s. (not significant). Specific leaf area (SLA), LCC, LNC and LPC (leaf carbon, leaf nitrogen and leaf phosphorous content respectively), leaf C:N:P stoichiometry, and Phenological index (PSI). N= 22 in Semiarid Mediterranean Shrubland (SaMS); N = 26 in Subdesert Mediterranean Shrubland (SMS); N = 30 in Subalpine Shrubland (SAS); N= 27 in Alpine Cushion Shrubland (AcS); N= 21 in Alpine Juniper prostrate Shrubland (AjS). Degrees of freedom (df) = 4.

|                                         | F    | Sig. |
|-----------------------------------------|------|------|
| SLA (mm <sup>2</sup> mg <sup>-1</sup> ) | 2.63 | 0.04 |
| LNC (mg g <sup>-1</sup> )               | 3.17 | 0.02 |
| LCC (mg g <sup>-1</sup> )               | 6.89 | 0.00 |
| LPC (mg g <sup>-1</sup> )               | 5.19 | 0.00 |
| N:P                                     | 4.11 | 0.00 |
| C:N                                     | 4.93 | 0.00 |
| PSI index                               | 3.00 | 0.02 |

Table S2.- Results from univariate ANOVAs testing differences between leaf functional traits and functional groups. For each analysis, *F*-value is shown. n.s. (not significant). Specific leaf area (SLA), LCC, LNC and LPC (leaf carbon, leaf nitrogen and leaf phosphorous content respectively), leaf C:N:P stoichiometry, and Phenological index (PSI). N= 27 in Perennial Herbs (PH); N = 13 in Deciduous Half Shrubs (DHS); N= 5 in Deciduous Large Shrubs (DLS); N= 48 in Evergreen Half Shrubs (EHS); N= 15 in Evergreen Large Shrubs (ELS); N= 5 in Deciduous Trees (DT); N= 5 in Evergreen Trees (ET) and N = 8 in Succulents (SC); df = 7.

|                                         | F          | Sig. |
|-----------------------------------------|------------|------|
| SLA (mm <sup>2</sup> mg <sup>-1</sup> ) | 3.64       | 0.00 |
| LNC (mg g <sup>-1</sup> )               | 2.393      | 0.03 |
| LCC (mg g <sup>-1</sup> )               | 5.375      | 0.00 |
| LPC (mg g <sup>-1</sup> )               | 0.672 n. s | 0.70 |
| N:P                                     | 2.85       | 0.01 |
| C:N                                     | 0.59 n. s  | 0.77 |
| PSI index                               | 1.67 n. s  | 0.12 |
